# Supplementary material
Source: PubMed Central journal article supplement (PMC3899837)

## A. 22Rv1

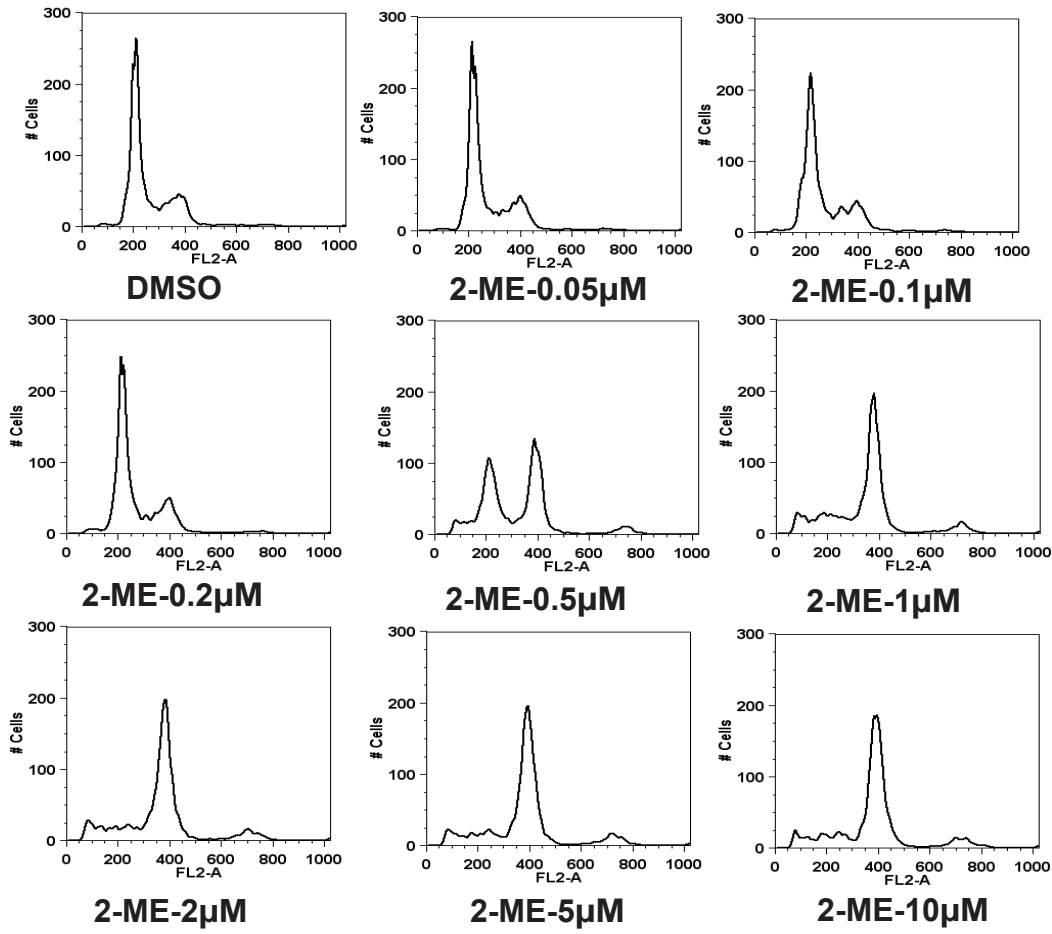

## B. RWPE1

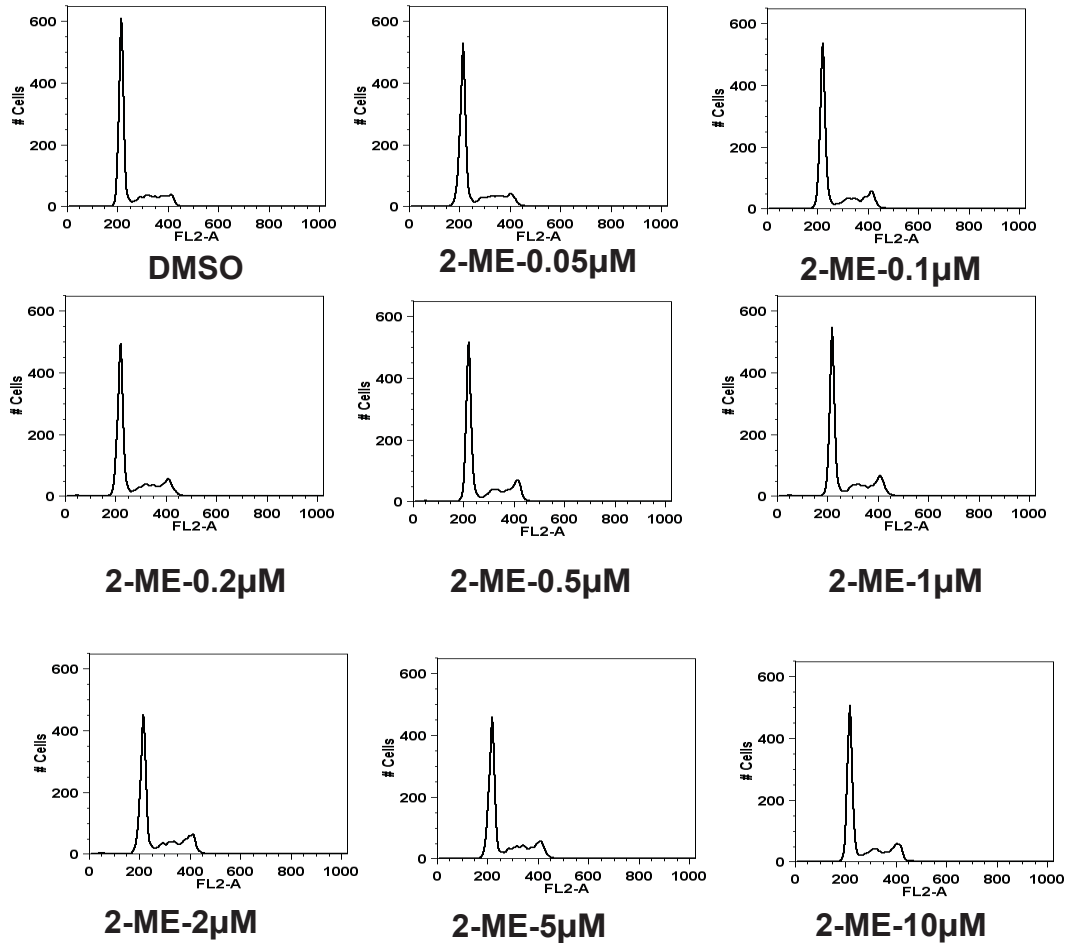

Fig-S1

Supplement: NIHMS541596-supplement-1.pdf [file NIHMS541596-supplement-1.pdf]

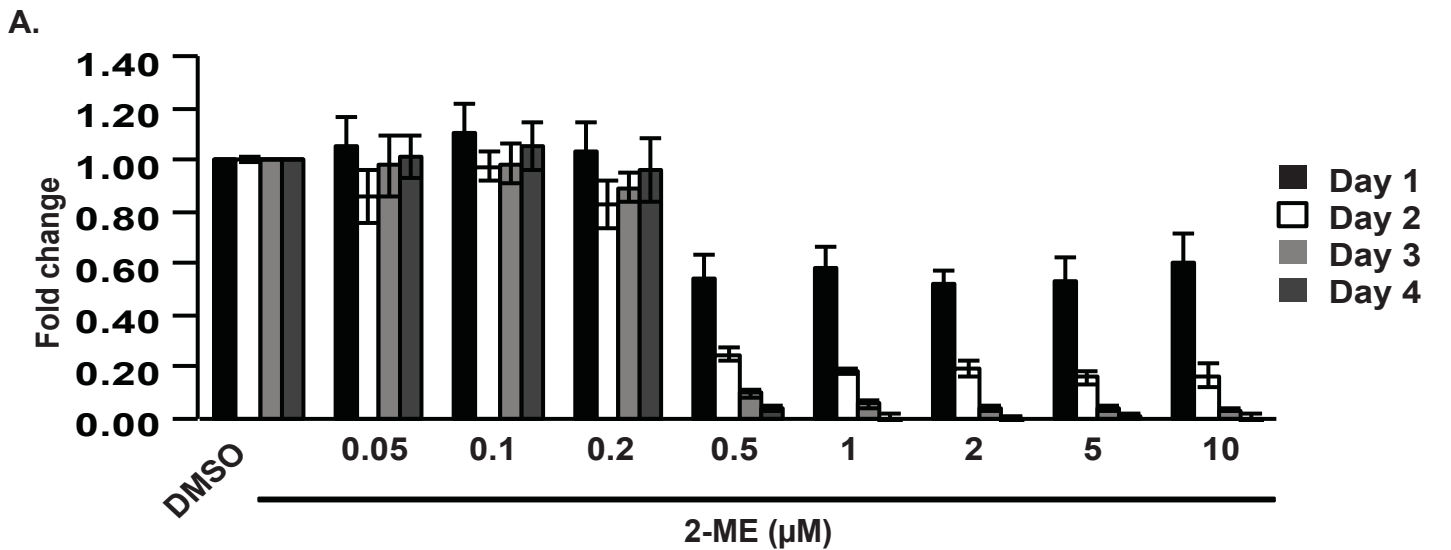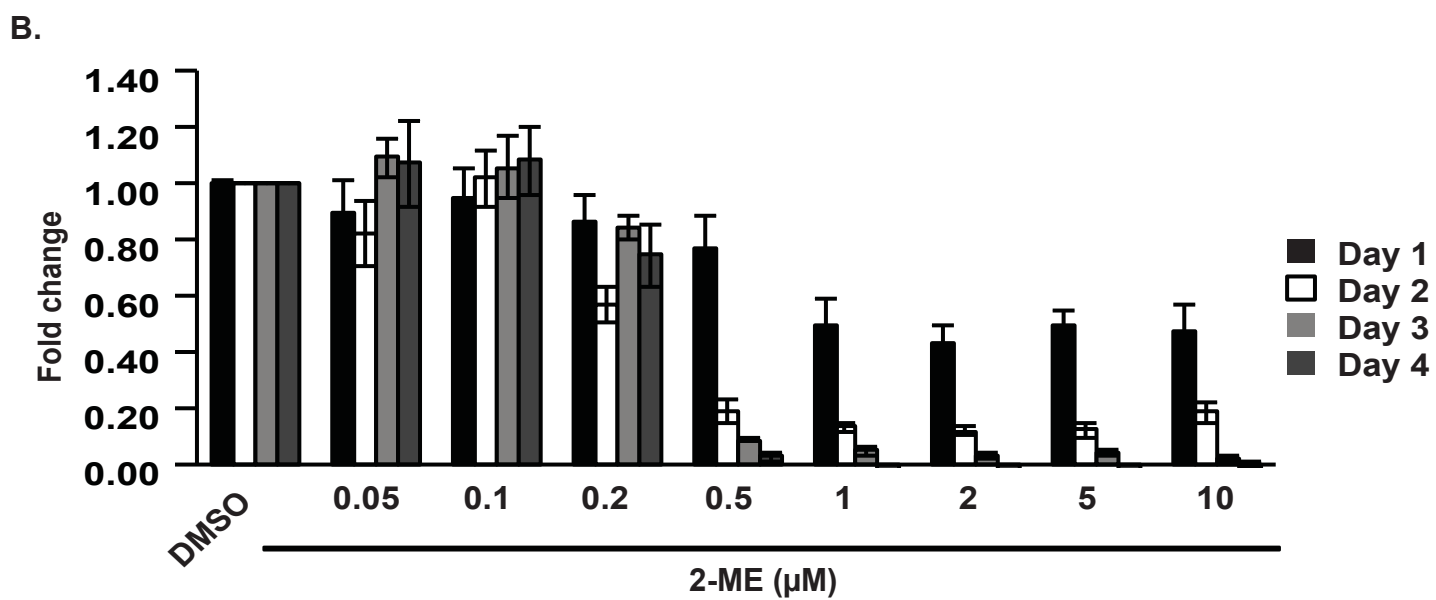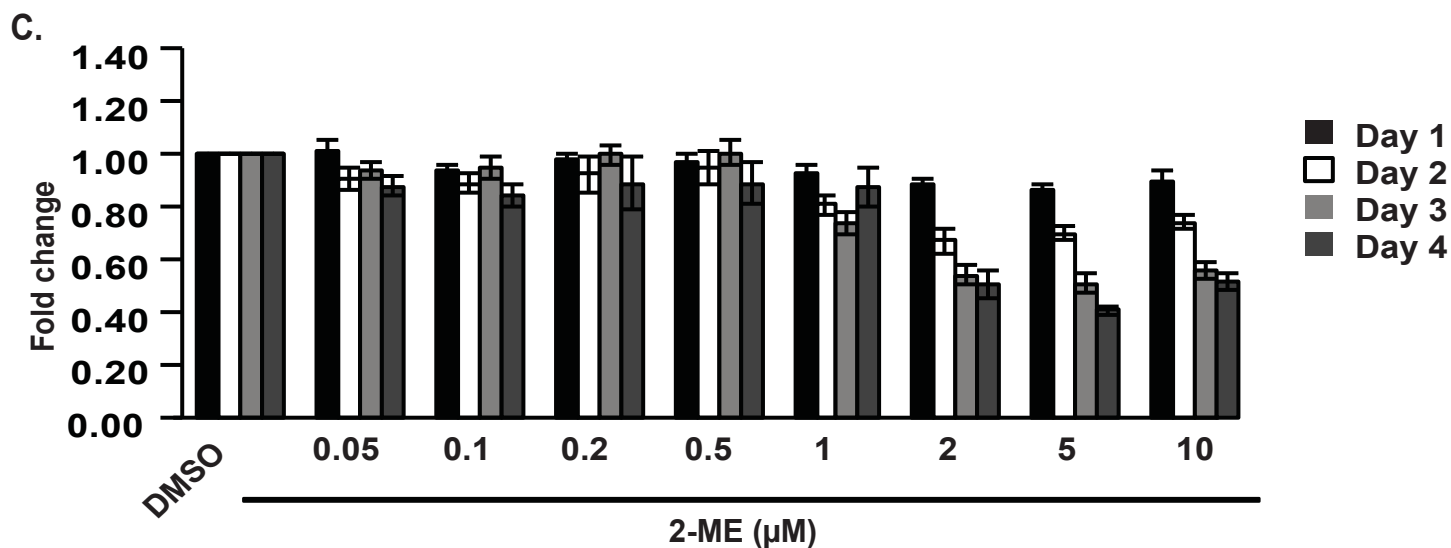

Fig-S3

Supplement: NIHMS541596-supplement-3.pdf [file NIHMS541596-supplement-3.pdf]

A.

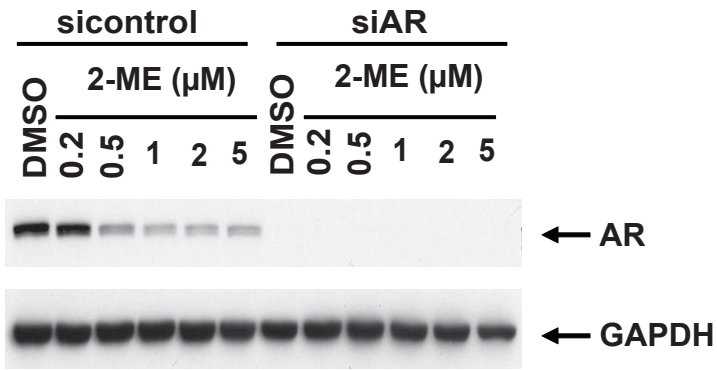

B.

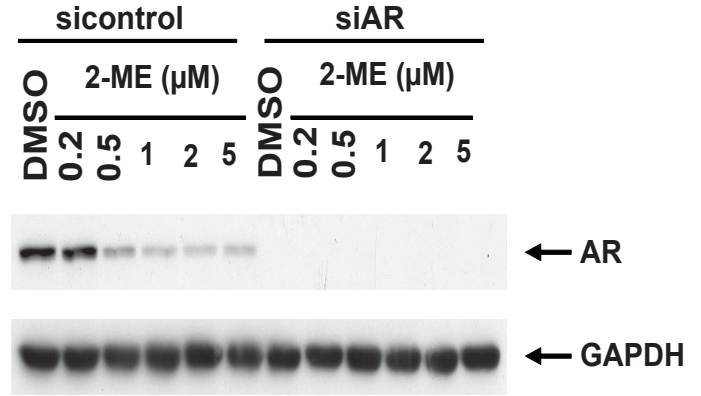

C.

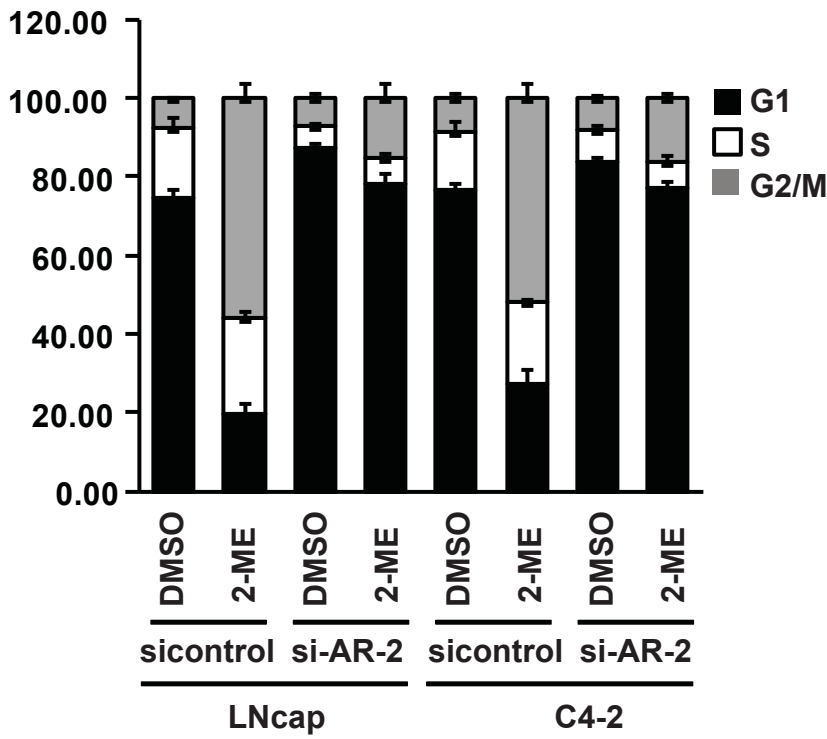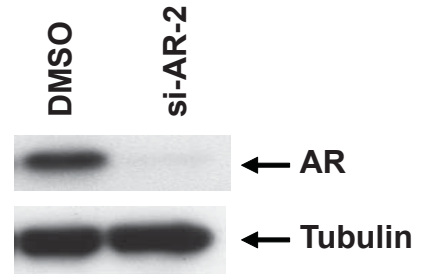

Supplement: NIHMS541596-supplement-5.pdf [file NIHMS541596-supplement-5.pdf]

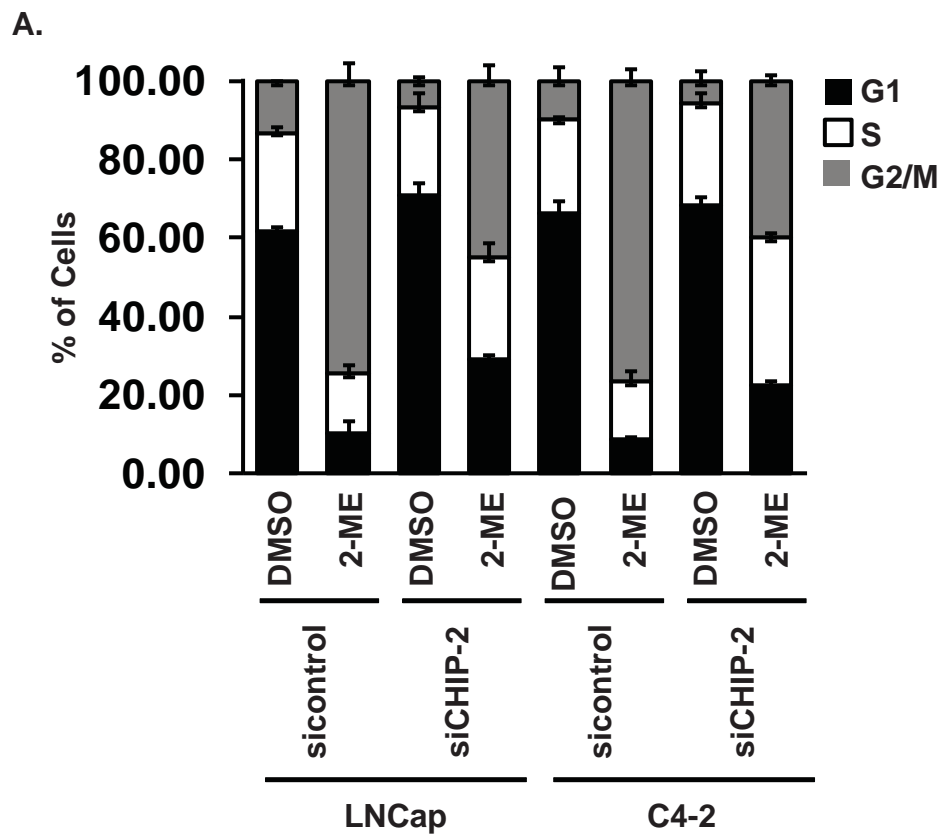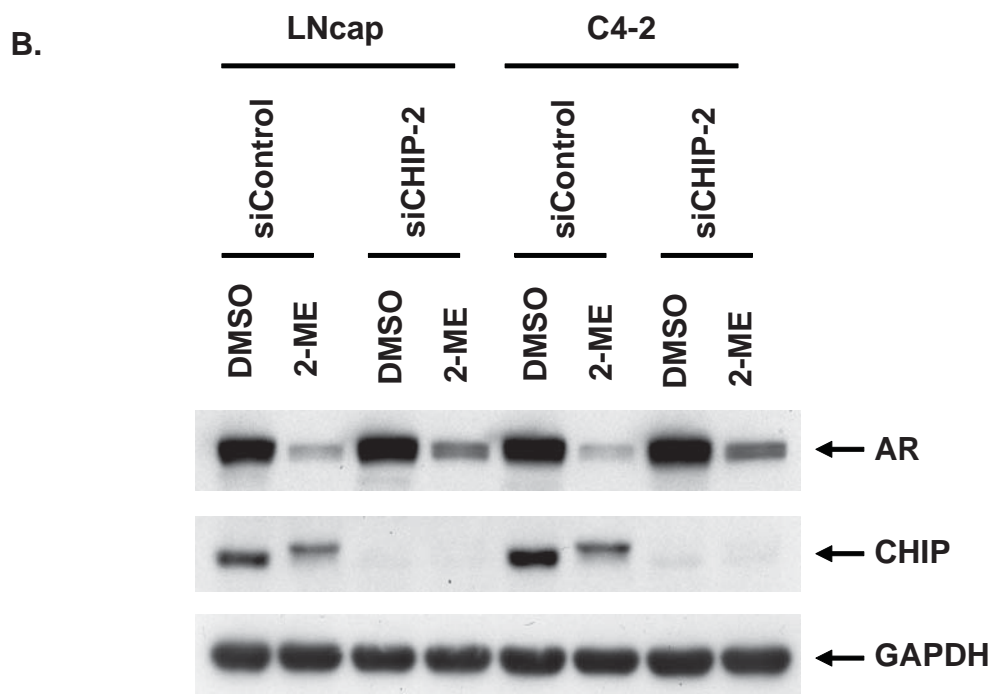

Fig-S6

Supplement: NIHMS541596-supplement-6.pdf [file NIHMS541596-supplement-6.pdf]

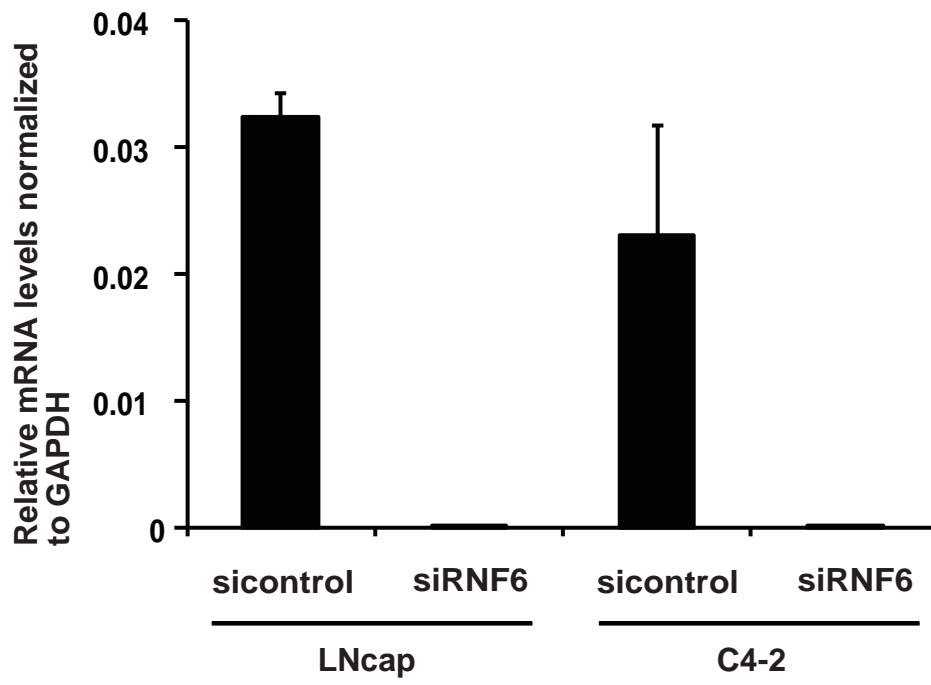

Fig-S7

Supplement: NIHMS541596-supplement-7.pdf [file NIHMS541596-supplement-7.pdf]

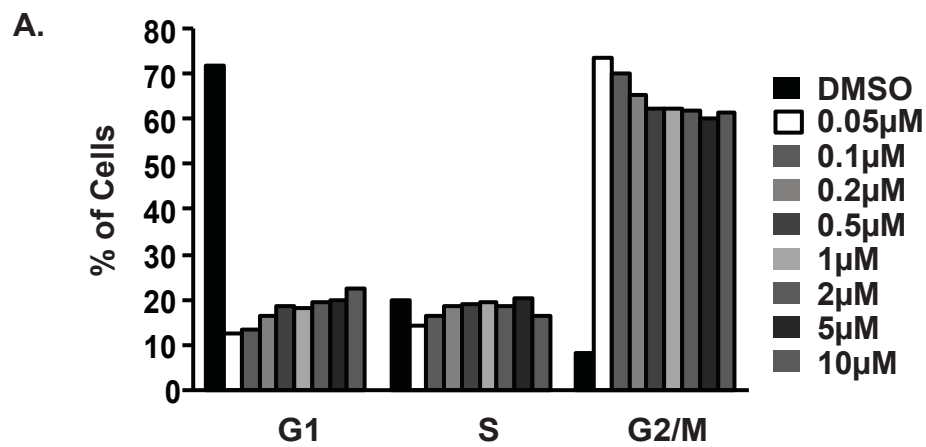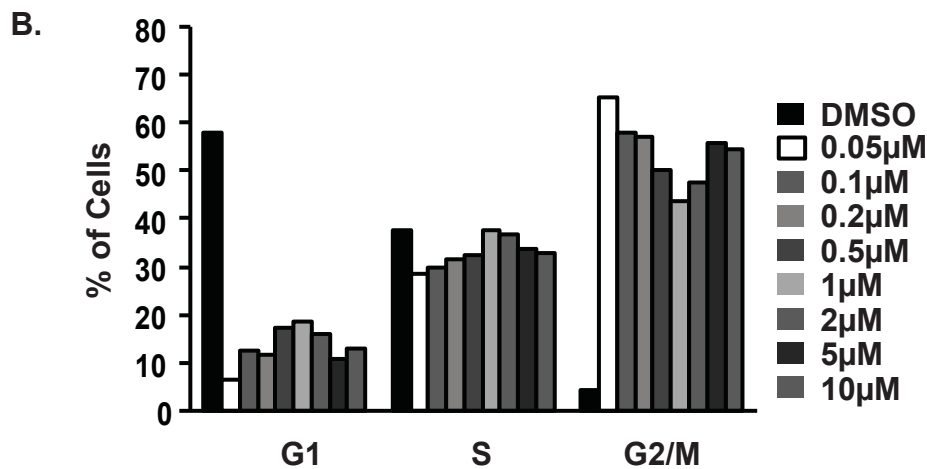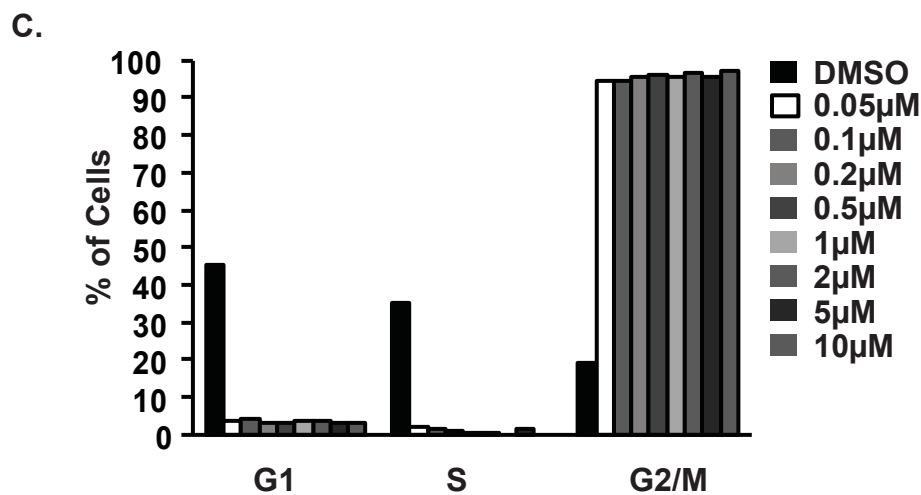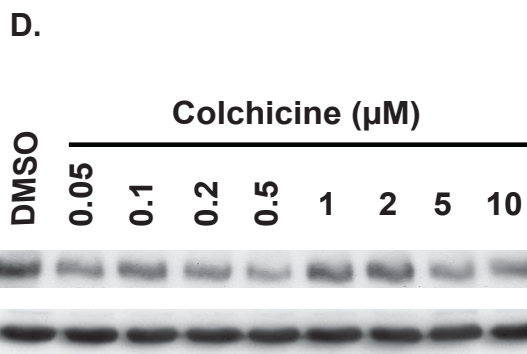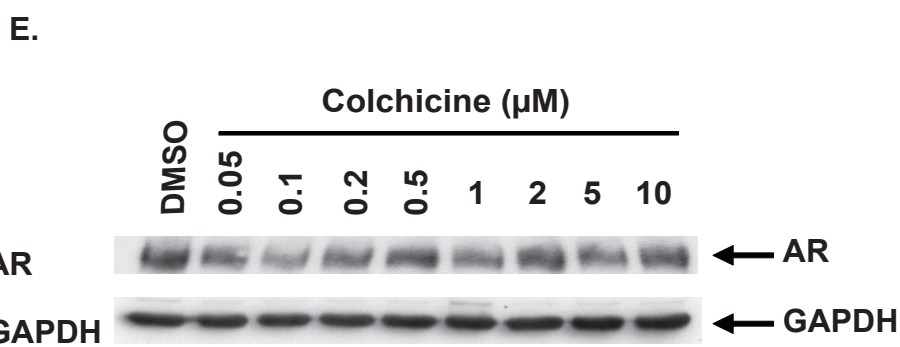

Fig-S8

Supplement: NIHMS541596-supplement-8.pdf [file NIHMS541596-supplement-8.pdf]
